# Supplementary material for: A novel system for tracking social preference dynamics in mice reveals sex- and strain-specific characteristics
Source: PubMed Central journal article supplement (PMC5627457; doi:10.1186/s13229-017-0169-1), 2017-10-03
Supplement: 13229_2017_169_MOESM1_ESM.pdf [file 13229_2017_169_MOESM1_ESM.pdf]

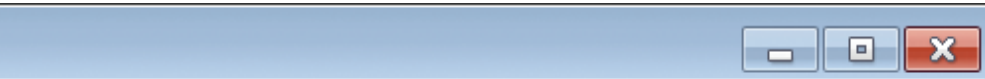

### Session analysis

**Load session file (AVI)** **Inspect movie**  Rat  Mouse

Movie number:

Areas definition:

|                                              |                                                                           |                                                           |                                                                           |
|----------------------------------------------|---------------------------------------------------------------------------|-----------------------------------------------------------|---------------------------------------------------------------------------|
| <input type="button" value="Compartment 1"/> | <input checked="" type="radio"/> Polygon <input type="radio"/> Elliptical | <input type="button" value="Stimulus 1"/>                 | <input checked="" type="radio"/> Polygon <input type="radio"/> Elliptical |
| <input type="button" value="Compartment 2"/> | <input checked="" type="radio"/> Polygon <input type="radio"/> Elliptical | <input type="button" value="Stimulus 2"/>                 | <input checked="" type="radio"/> Polygon <input type="radio"/> Elliptical |
| <input type="button" value="Compartment 3"/> | <input checked="" type="radio"/> Polygon <input type="radio"/> Elliptical | <input type="button" value="Stimulus 3"/>                 | <input checked="" type="radio"/> Polygon <input type="radio"/> Elliptical |
| <input type="button" value="Compartment 4"/> | <input checked="" type="radio"/> Polygon <input type="radio"/> Elliptical | <input type="button" value="Save compartments settings"/> |                                                                           |
| <input type="button" value="Compartment 5"/> | <input checked="" type="radio"/> Polygon <input type="radio"/> Elliptical | <input type="button" value="Load compartments settings"/> |                                                                           |

Please choose session analysis algorithm

Starting frame for analysis:

Ending frame for analysis:

Threshold for detection (between 0 and 1):  
Low:  High:

Data to extract:

|                                                                     |                                                                         |
|---------------------------------------------------------------------|-------------------------------------------------------------------------|
| <input checked="" type="checkbox"/> Mouse location (center of body) | <input checked="" type="checkbox"/> Save analyzed movie                 |
| <input checked="" type="checkbox"/> Times of stimuli exploration    | <input checked="" type="checkbox"/> Save results when analysis finished |
| <input checked="" type="checkbox"/> Times in different compartments |                                                                         |

### Results presentation

**Load results file**

Data to present:

- Mouse location trace
- Compartments occupation along session
- Stimuli exploration along session
- Total time in Compartments
- Total stimuli exploration time
- Two mice interaction along session
- Total time of two mice interaction

File format  PDF  EPS
