# Supplementary material for: A novel system for tracking social preference dynamics in mice reveals sex- and strain-specific characteristics
Source: PubMed Central journal article supplement (PMC5627457; doi:10.1186/s13229-017-0169-1), 2017-10-03

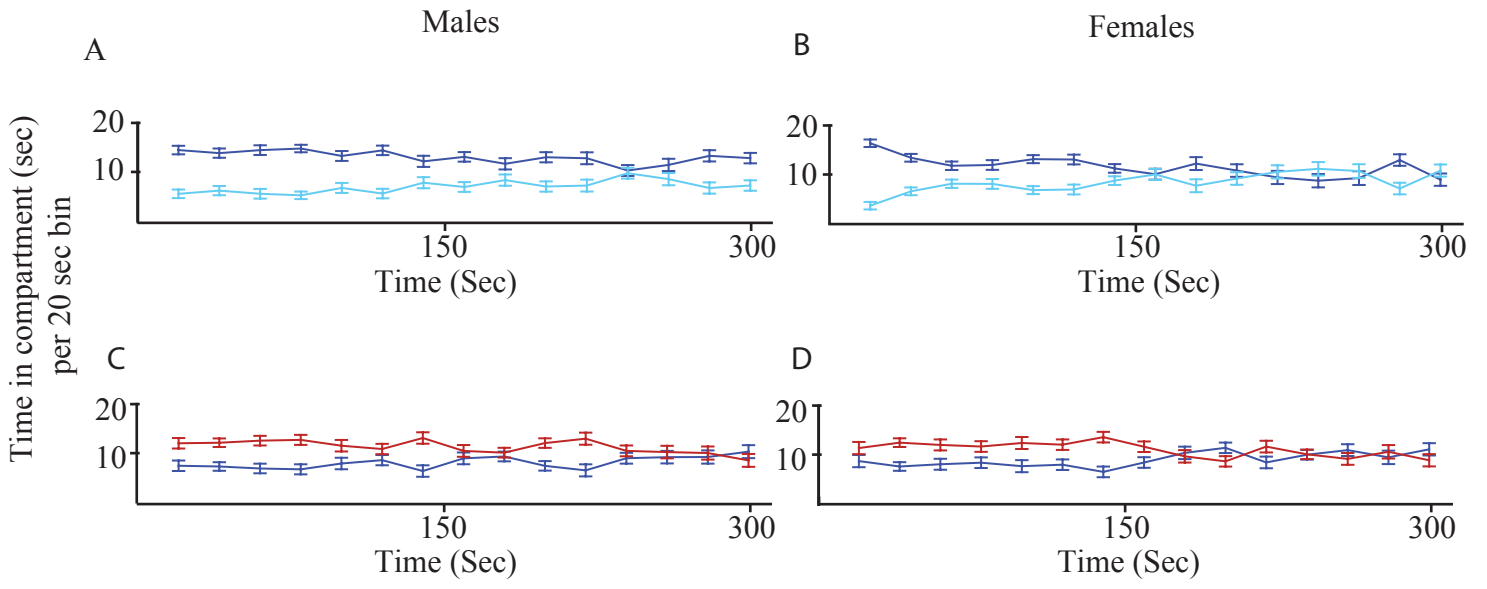

Supplement: 13229_2017_169_MOESM4_ESM.pdf [file 13229_2017_169_MOESM4_ESM.pdf]
